# Supplementary material
Source: PubMed Central journal article supplement (PMC5378138)
Supplement: rsif20161038supp1.pdf [file rsif20161038supp1.pdf]

Supplementary online Material  
article [TITLE]

Alexander Blanke<sup>1</sup>, Helmut Schmitz<sup>2</sup>, Alessandra Patera<sup>3</sup>, Hugo Dutel<sup>1</sup>, Michael J. Fagan<sup>1</sup>

<sup>1</sup> Medical and Biological Engineering Research Group, School of Engineering,  
University of Hull, Hull HU6 7RX, UK

<sup>2</sup> Institute for Zoology, University of Bonn, Poppelsdorfer Schloss, 53115 Bonn, Germany

<sup>3</sup> Swiss Light Source, Paul Scherrer Institut, Villigen, 5232, Switzerland

Contact: Alexander Blanke; a.blanke@hull.ac.uk

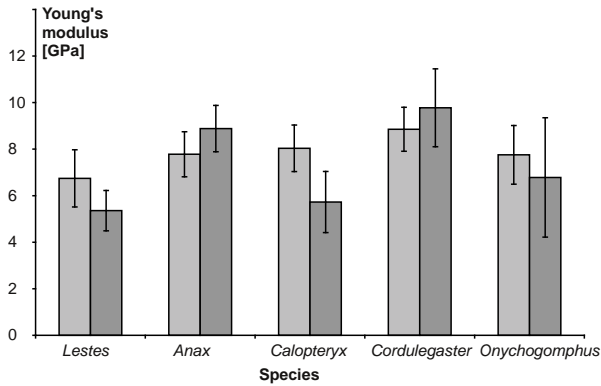

Figure S1 Results for the Young's modulus (GPa) of the nanoindentation experiments for dry (light grey) and rewetted (dark grey) mandibles of five odonate species.

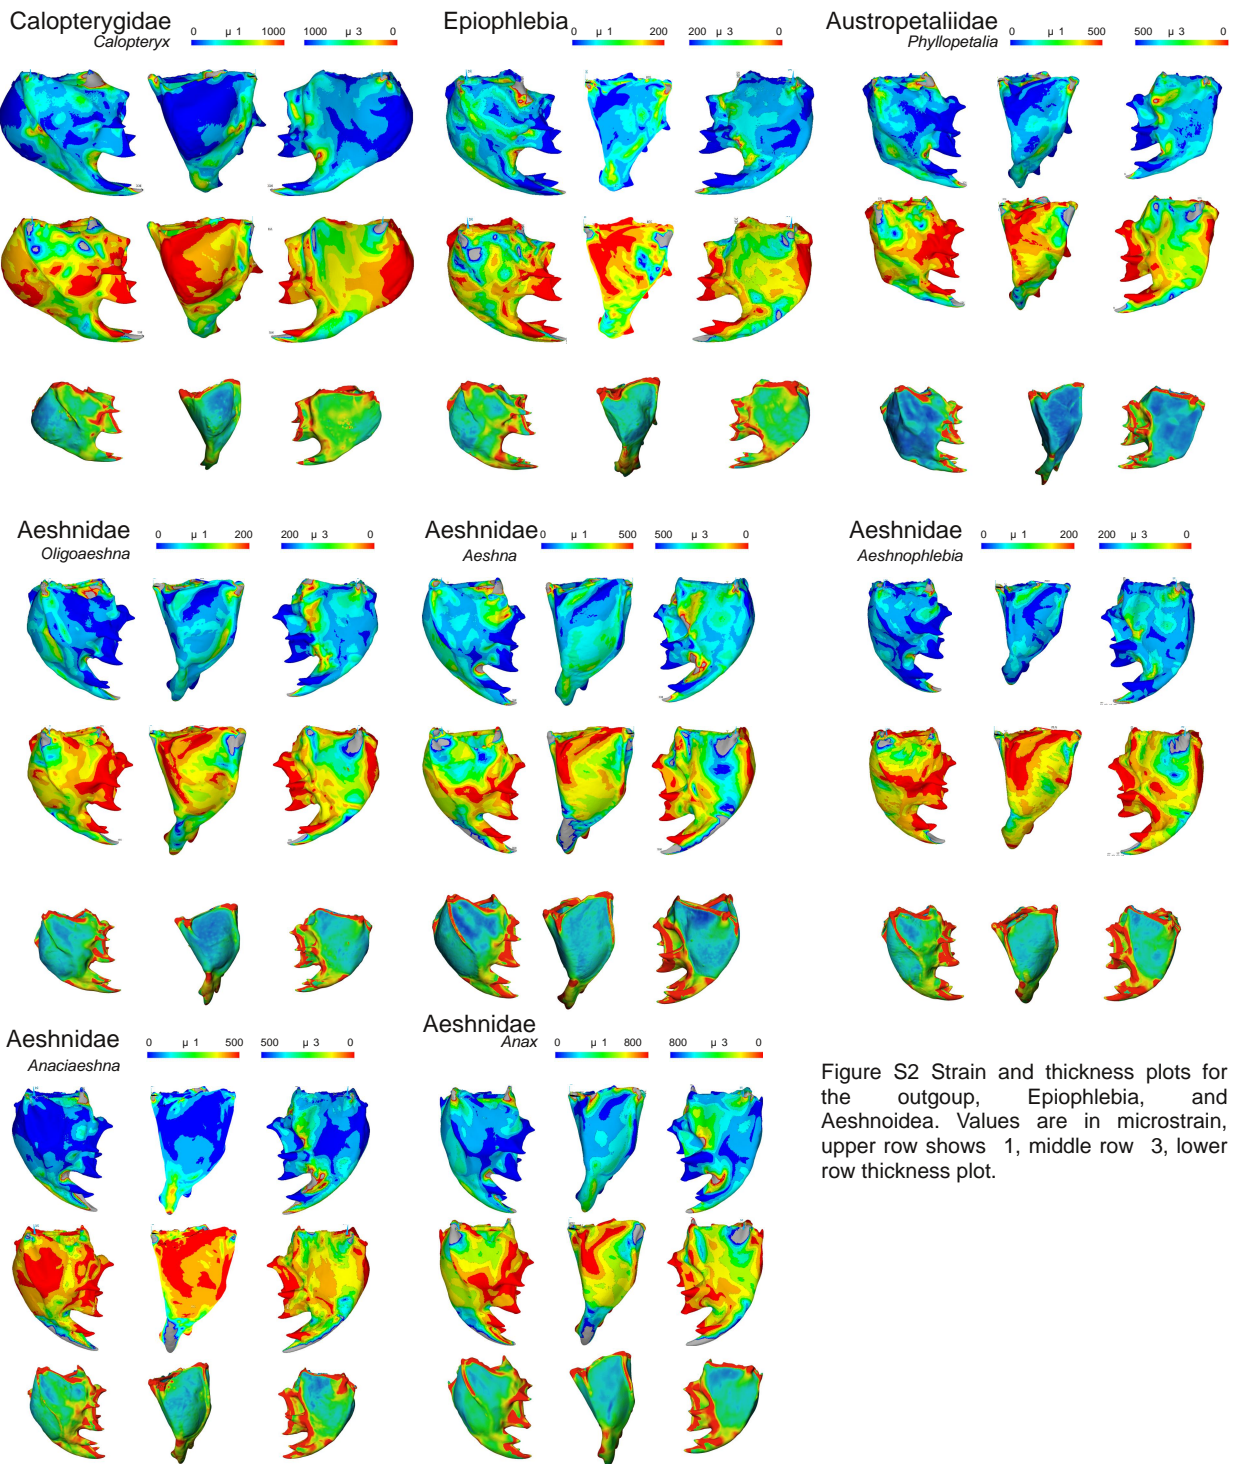

Figure S2 Strain and thickness plots for the outgroup, Epiophlebia, and Aeshnoidea. Values are in microstrain, upper row shows 1, middle row 3, lower row thickness plot.

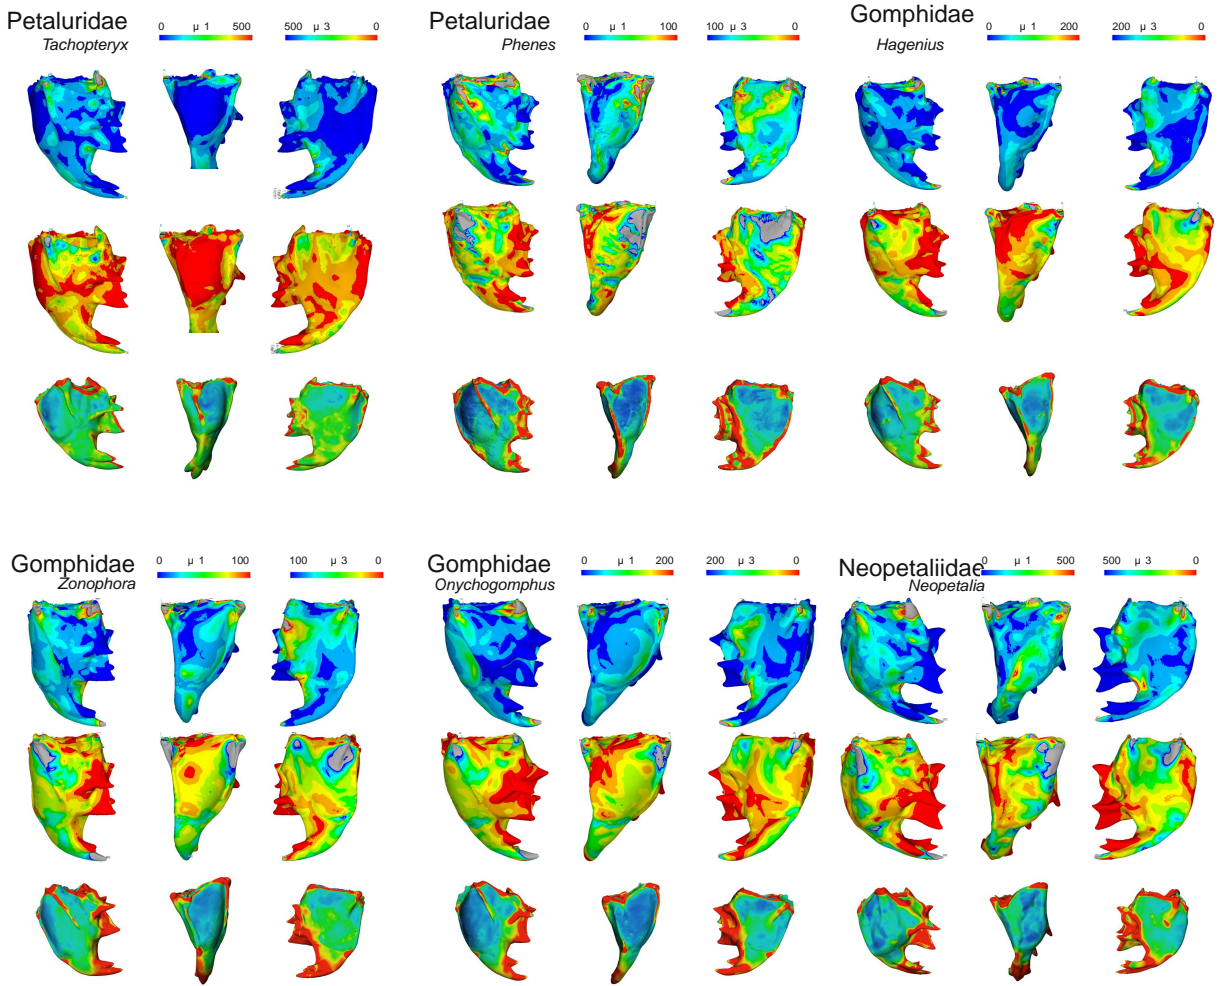

Figure S3 Strain and thickness plots for Petaluridae, Gomphidae and Neopetaliidae. Values are in microstrain, upper row shows 1, middle row 3, lower row thickness plot.

### Cordulegastridae

*Anotogaster* 0  $\mu$  1 100 200  $\mu$  3 0

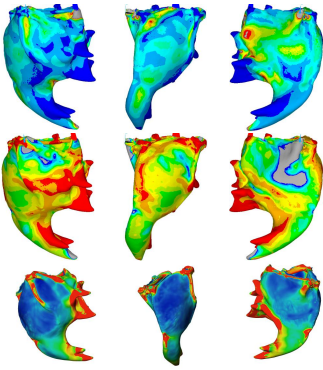

### Cordulegastridae

*Cordulegaster* 0  $\mu$  1 500 500  $\mu$  3 0

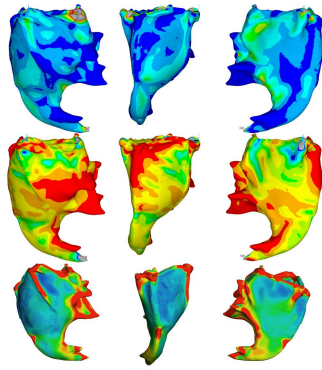

### Corduliidae

*Cordulia* 0  $\mu$  1 500 500  $\mu$  3 0

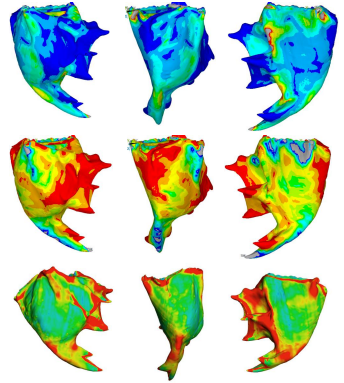

### Macromiidae

*Epoptalmia* 0  $\mu$  1 200 200  $\mu$  3 0

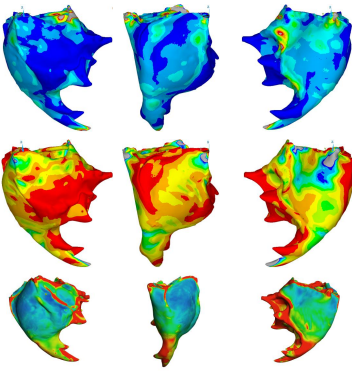

### Macromiidae

*Macromia* 0  $\mu$  1 300 300  $\mu$  3 0

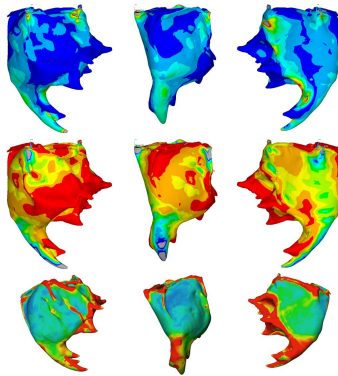

### Libellulidae

*Sympetrum* 0  $\mu$  1 1000 1000  $\mu$  3 0

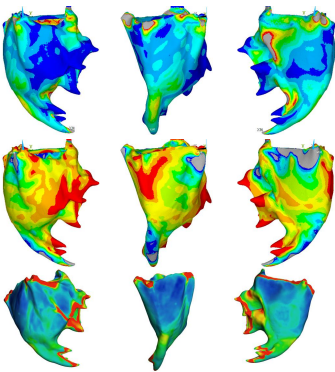

### Libellulidae

*Libellula* 0  $\mu$  1 1000 1000  $\mu$  3 0

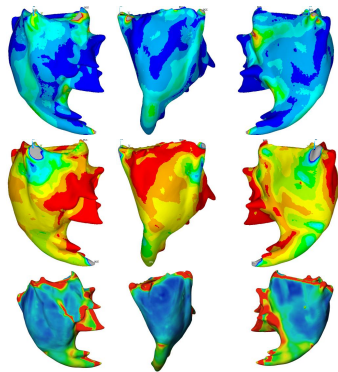

Figure S4 Strain and thickness plots for Cordulegastridae, Corduliidae, Macromiidae and Libellulidae. Values are in microstrain, upper row shows 1, middle row 3, lower row thickness plot.
