# Supplementary material
Source: PubMed Central journal article supplement (PMC5378138)

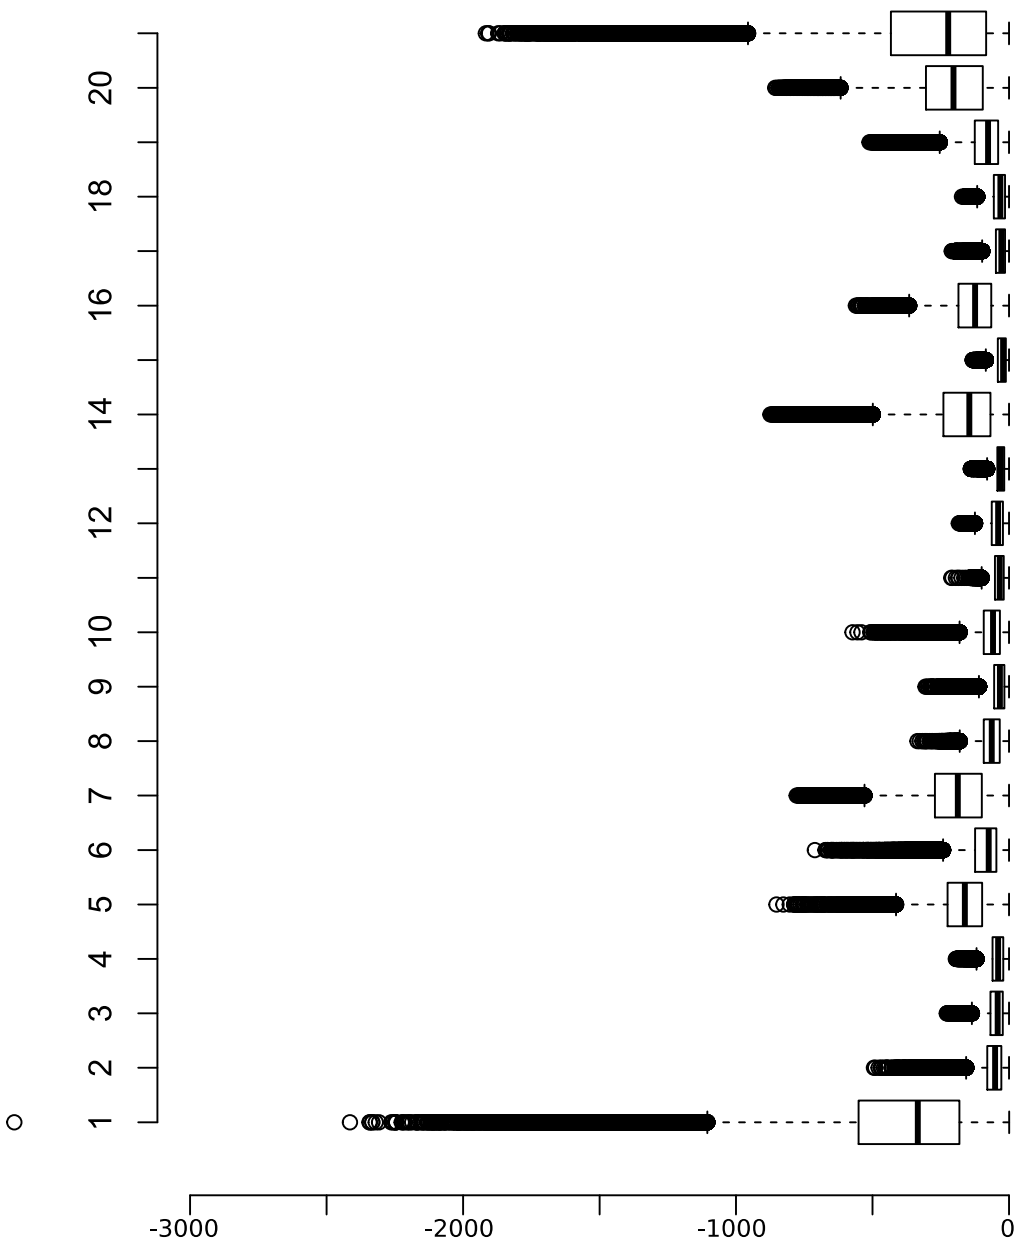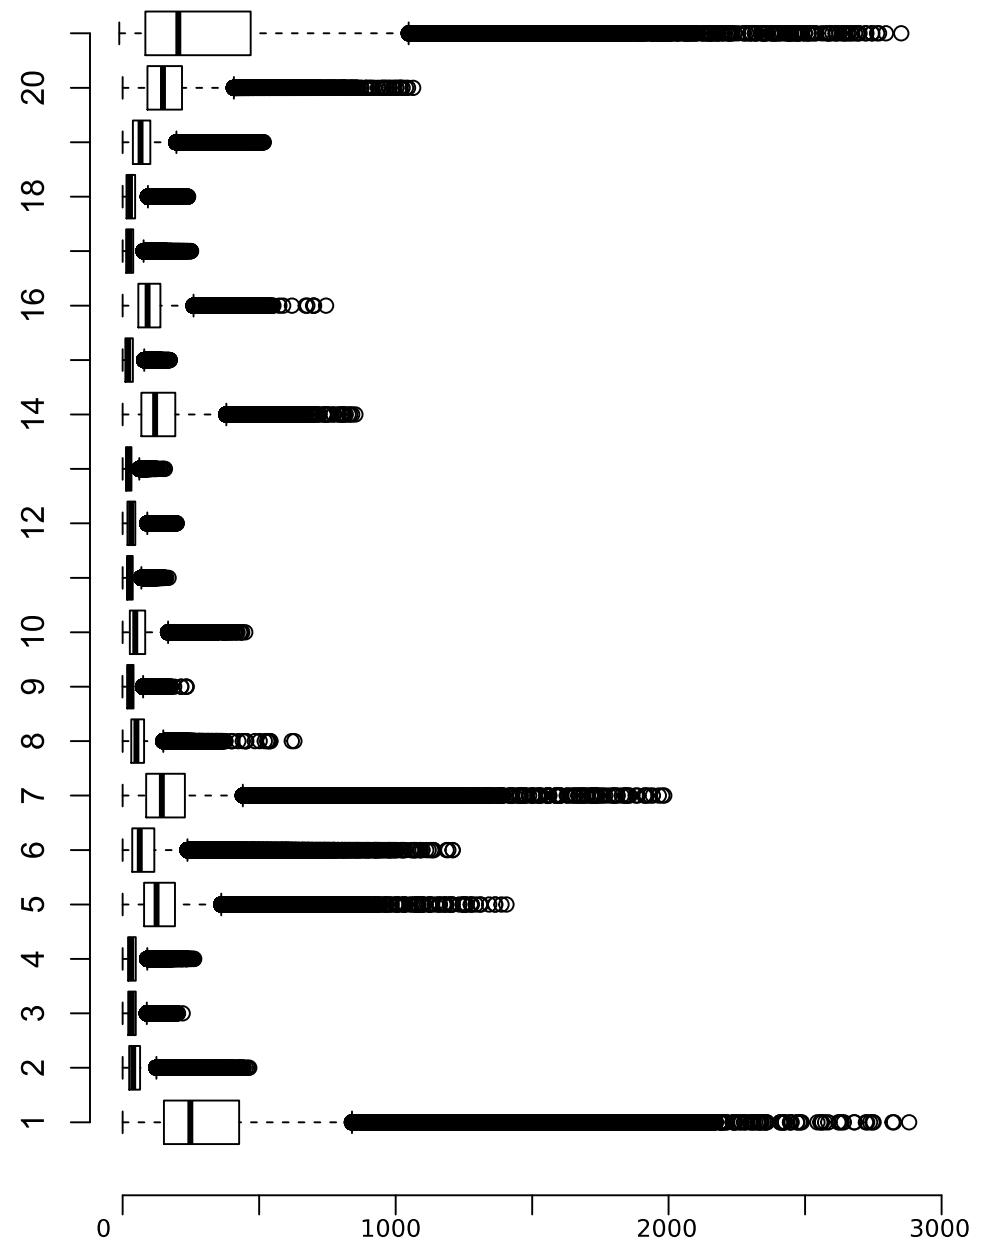

Supplement: rsif20161038supp2.pdf [file rsif20161038supp2.pdf]
